# Supplementary material for: Patient and clinician experience of a serious illness conversation guide in oncology: A descriptive analysis
Source: PubMed Central journal article supplement (PMC7333843; doi:10.1002/cam4.3102), 2020-05-04
Supplement: CAM4-9-4550-s001.pdf [file CAM4-9-4550-s001.pdf]

# Supplemental Figure 1: CONSORT Diagram

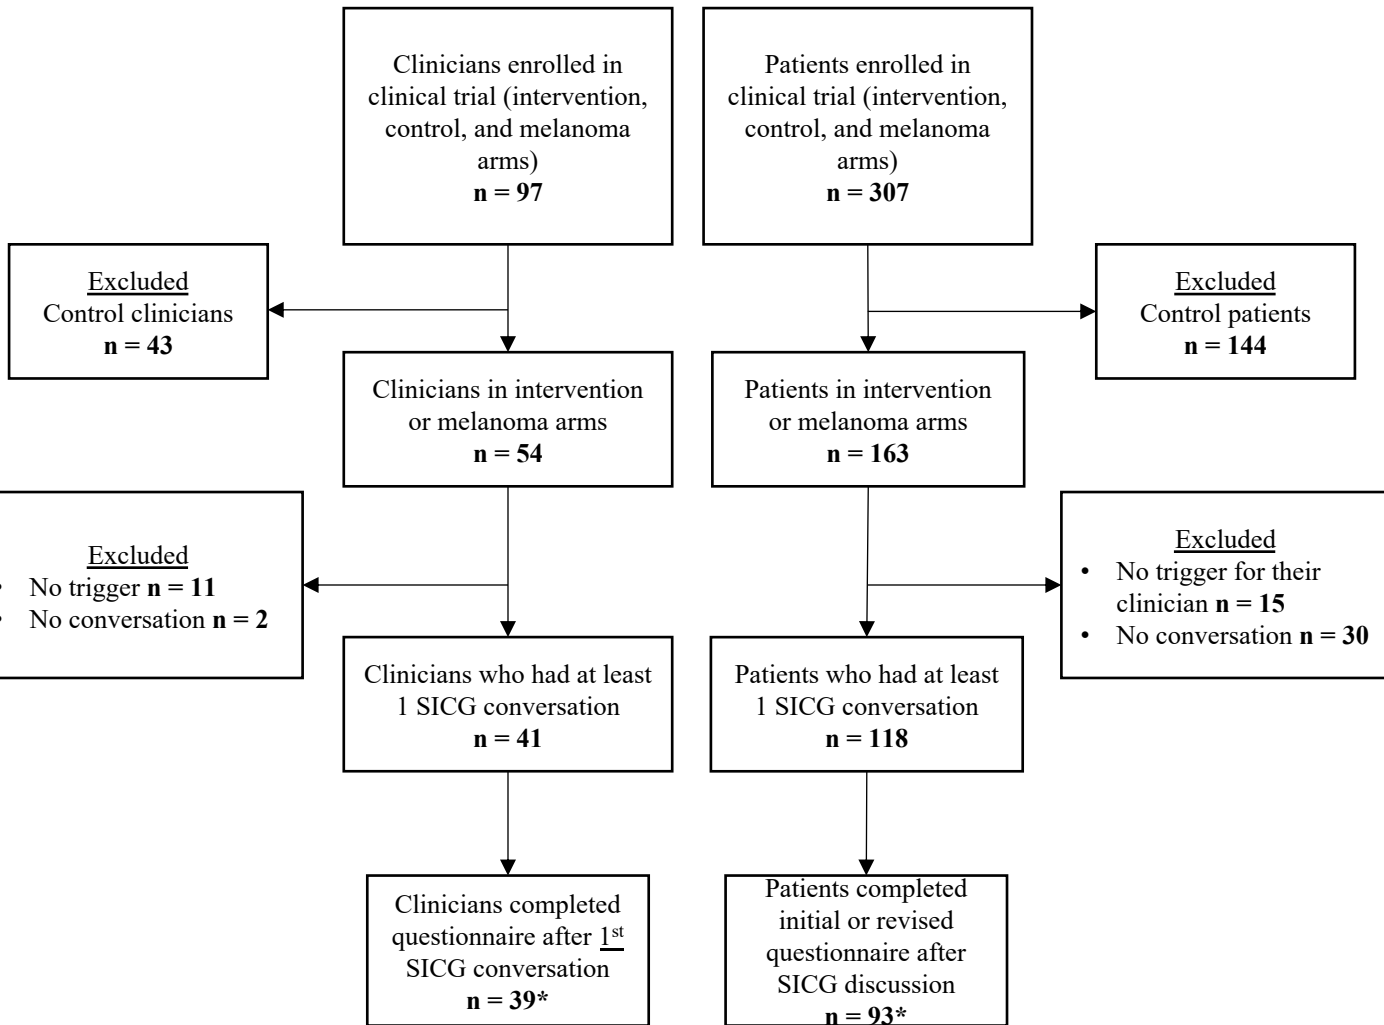

\*21 clinicians completed an additional 3 questions at the end of the trial

\*46 patients completed the revised questionnaire
